# Supplementary material for: Evidence for spinal disinhibition as a pain-generating mechanism in fibromyalgia syndrome
Source: PubMed Central journal article supplement (PMC11677609; doi:10.1097/pr9.0000000000001236), 2024-12-26
Supplement: painreports-10-e1236-s001.pdf [file painreports-10-e1236-s001.pdf]

**Supplementary Table 1. Current pain medication.** Number of individuals with FMS and healthy volunteers taking each category/combination of medication. No medication (category green), one medication (category blue), two medication (category peach) and three medications (category orange).

|                                       | FMS       | HV        |
|---------------------------------------|-----------|-----------|
| <b>No pain medication</b>             | <b>10</b> | <b>15</b> |
| <b>Gabapentinoids</b>                 | <b>1</b>  | <b>0</b>  |
| <b>SNRI</b>                           | <b>1</b>  | <b>0</b>  |
| <b>SSRI</b>                           | <b>2</b>  | <b>2</b>  |
| <b>Tricyclics</b>                     | <b>1</b>  | <b>0</b>  |
| <b>NSAIDS</b>                         | <b>3</b>  | <b>2</b>  |
| <b>Opioids</b>                        | <b>0</b>  | <b>0</b>  |
| <b>Gabapentinoids + opioid</b>        | <b>1</b>  | <b>0</b>  |
| <b>SNRI + SSRI</b>                    | <b>1</b>  | <b>0</b>  |
| <b>SNRI + opioid</b>                  | <b>2</b>  | <b>0</b>  |
| <b>SSRI + opioid</b>                  | <b>1</b>  | <b>0</b>  |
| <b>SSRI + tricyclic</b>               | <b>1</b>  | <b>0</b>  |
| <b>Tricyclic + opioid</b>             | <b>1</b>  | <b>0</b>  |
| <b>NSAID + opioid</b>                 | <b>3</b>  | <b>0</b>  |
| <b>NSAID + SSRI</b>                   | <b>0</b>  | <b>1</b>  |
| <b>Gabapentinoids + opioid + SNRI</b> | <b>2</b>  | <b>0</b>  |
| <b>SNRI + opioid + NSAID</b>          | <b>1</b>  | <b>0</b>  |
